# Supplementary material for: Alcohol- and acid-causing reversible switching of near-infrared absorption and luminescence in a donor–acceptor conjugated system
Source: Royal Society of Chemistry journal article supplement (doi:10.1039/b823248b), 2009-01-01
Supplement: b823248b.pdf [file b823248b.pdf]

## Electronic Supplementary Information

### **Alcohol- and acid-causing reversible switching of near-infrared absorption and luminescence in a donor–acceptor conjugated system**

Mio Kondo, Maai Uchikawa, Shoko Kume, Hiroshi Nishihara

## Determination of the structure of **1-*p*-TolPyl-OMe**

The chemical structure of **1-*p*-TolPyl-OMe**, an acetal compound of **1-*p*-TolPyl**, was determined by  $^1\text{H}$  NMR,  $^{13}\text{C}$  NMR, HMQC, and HMBC spectra. In this section, the assignment of these spectra is described in detail.

$^1\text{H}$  NMR, HMQC, and HMBC spectra of **1-*p*-TolPyl-OMe** are shown in Figs. 2 and S3. The expected chemical structures of **1-*p*-TolPyl-OMe** are shown in Fig. 2a. **1** and **2** can be distinguished by HMBC measurement, because carbon atoms that have correlation with  $\text{H}_a$  (see Fig. 2a) should change (i.e.  $\text{H}_a$  of **1** would correlate with C20 and,  $\text{H}_a$  of **2** would correlate with C6).

In the  $^1\text{H}$  NMR spectrum, three peaks that are assignable to a proton of methyl group ( $\text{H}_k$  in Fig. 2a), that of a methoxy group ( $\text{H}_l$ ), and  $\text{H}_a$  were observed at 2.41, 3.03, and 6.93 ppm, respectively. From the result of HMQC measurement, peaks of  $^{13}\text{C}$  observed at 21.2, 50.6, and 100.7 ppm are assigned to C1, C22, and C7, respectively. In an HMBC spectrum, cross peaks between  $\text{H}_k$  and  $^{13}\text{C}$  were observed at 130.3, and 140.7 ppm, and these peaks are assigned to C3 and C2, respectively. Thus, judging from the results of HMQC and HMBC measurement, peaks of  $^1\text{H}$  observed at 7.34 and 7.92 ppm are assignable to  $\text{H}_j$  and  $\text{H}_i$ , respectively. The peak at 94.4 ppm is assigned to C20 because the peak had correlation with  $\text{H}_l$ . The cross peak between C20 and  $\text{H}_a$  was not observed in the HMBC spectrum. Moreover, C20 had correlation with  $\text{H}_h$  in the HMBC spectrum. From these reasons, it is indicated that the chemical structure of **1-*p*-TolPyl-OMe** is not **1** in Fig. 2a. On the other hand, the correlation between  $\text{H}_a$  and the peak at 150.4 ppm was observed in the HMBC spectrum. The peak at 150.4 ppm also had correlation with  $\text{H}_i$  in the HMBC spectrum, and thus, the peak is assignable to C5 or C6 of **2** in Fig. 2a. Furthermore, the cross peak between  $\text{H}_j$  and the peak at 131.6 ppm, which is assignable to C5, was observed in the HMBC spectrum. Therefore, the peak at 150.4 ppm is assigned to C6 of **2**. In conclusion, the structure of **1-*p*-TolPyl-OMe** is determined to be **2**.

**Table S1.** Experimental and calculated excitation energies to the lowest excited state for **1-*p*-TolPyl-OMe**

| Excitation Energy / eV |        | Oscillator Strength (Theor.) | Assignment (CI Coefficient) |
|------------------------|--------|------------------------------|-----------------------------|
| Exptl.                 | Theor. |                              |                             |
| 3.22                   | 2.8498 | 0.0213                       | 93 -> 94 (0.68154)          |
| 3.55                   | 3.7266 | 0.546                        | 93 -> 95 (0.63745)          |

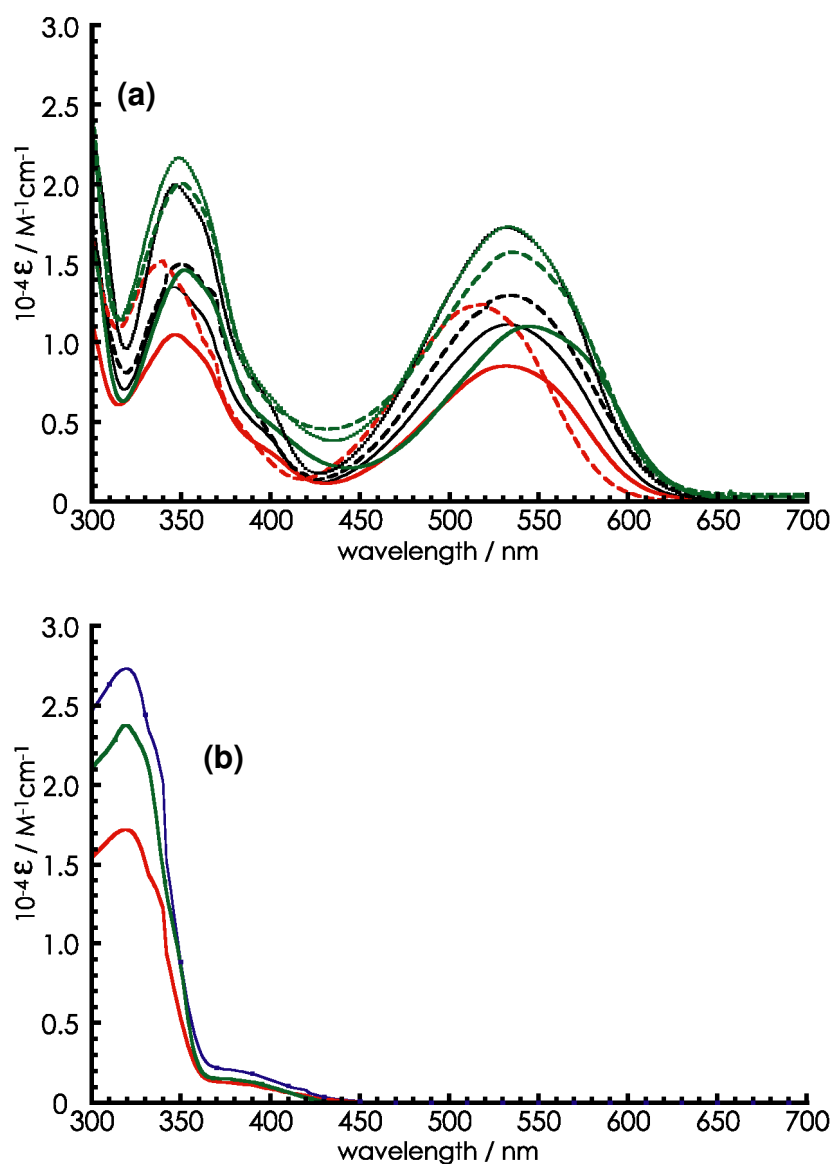

**Figure S1.** (a) UV-vis spectra of **1-p-TolPyl** in dichloromethane (black line), chloroform (black dashed line), 1,2-dichloroethane (black dotted line), benzonitrile (red line), acetonitrile (red dashed line), o-dichlorobenzene, (green line), toluene (green dashed line), and benzene (green dotted line). (b) UV-vis spectra of **1-p-TolPyl<sup>+</sup>** in methanol (red line), ethanol (blue line), and i-propyl alcohol (green line).

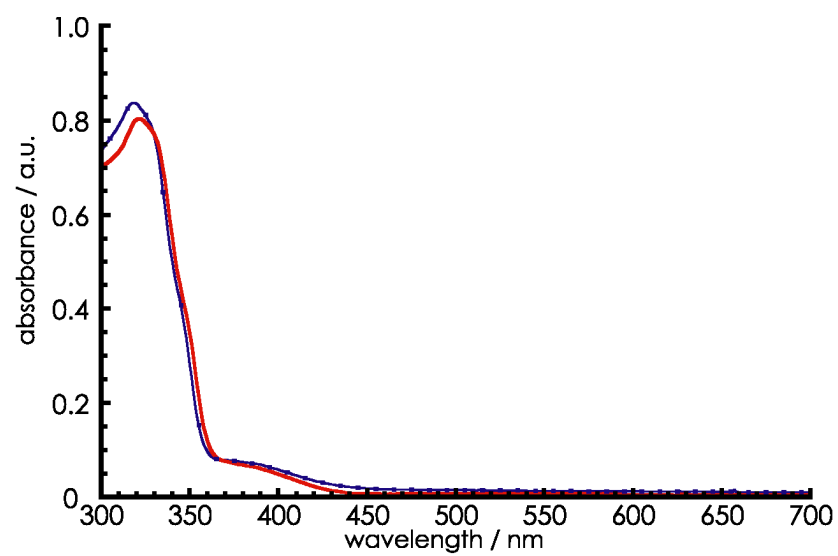

**Figure S2.** UV-vis spectra of **1-p-TolPyl** (blue line) in methanol and the isolated compound after reaction of **1-p-TolPyl** with NaOMe (red line) in dichloromethane.



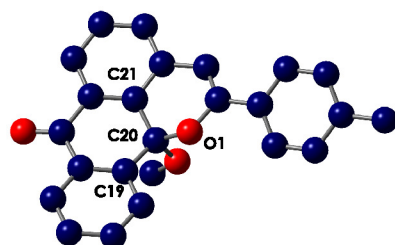

**Figure S4.** The optimized molecular structure of **1-*p*-TolPyl-OMe**.

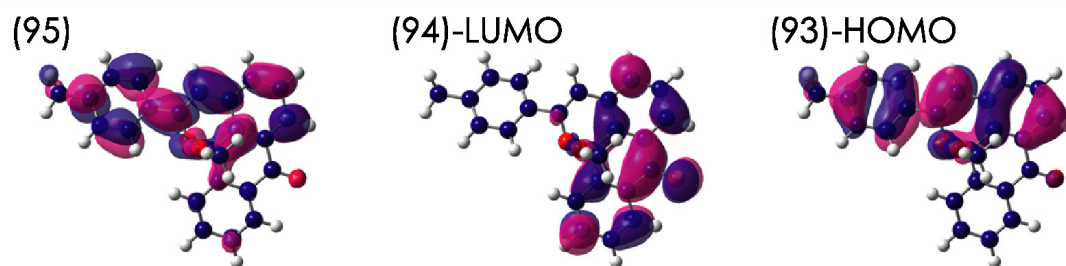

**Figure S5.** Molecular orbitals of **1-*p*-TolPyl-OMe** calculated at the B3LYP/6-31G +(p,d) level.



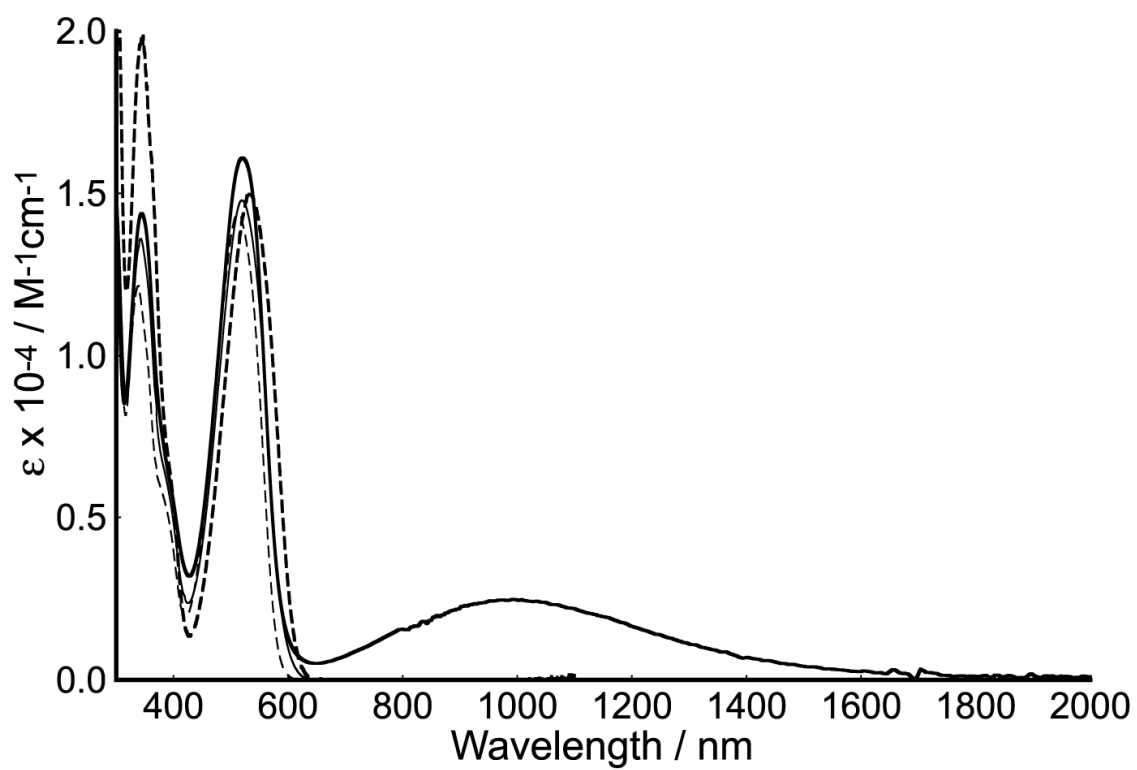

**Figure S6.** UV-vis-NIR spectra of **1-FcPyl<sup>+</sup>** (bold solid line), **1-p-TolPyl<sup>+</sup>** (bold dashed line), **1-m-TolPyl<sup>+</sup>** (solid line), **1-PhPyl<sup>+</sup>** (dashed line) in dichloromethane (0.5 mM).

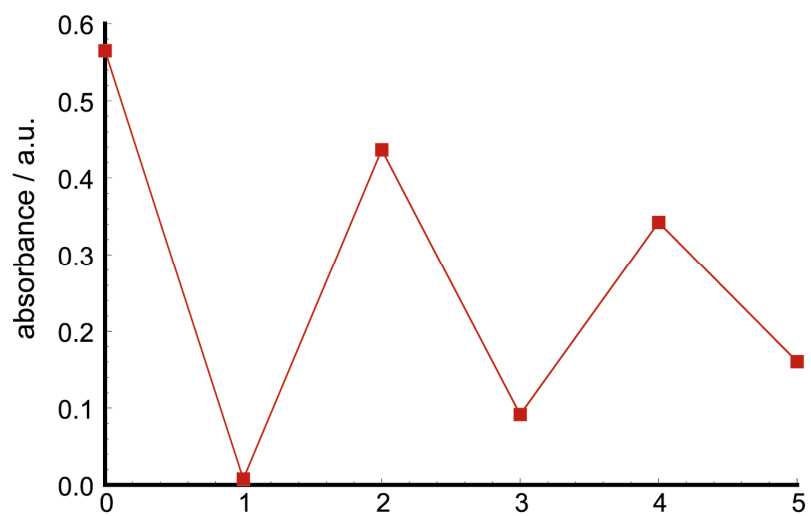

**Figure S7.** The changes of absorbance at 536 nm of **1-*p*-TolPyl<sup>+</sup>** upon the alternate addition of **TBACl** (1.0 eq.) and **TFSIH** (1.0 eq.) in 0.5 mM dichloromethane solution.
